# Supplementary material for: Genetic Variants of Fatty Acid Amide Hydrolase Modulate Acute Inflammatory Responses to Colitis in Adult Male Mice
Source: Front Cell Neurosci. 2021 Nov 22;15:764706. doi: 10.3389/fncel.2021.764706 (PMC8670533; doi:10.3389/fncel.2021.764706)
Supplement: Supplementary file 1 [file Table_1.xlsx]

## Sheet: Sheet1
Supplemental Table 1. Statistics
Figure 1			Figure 2												Figure 3
Figure 1A. Macroscopic tissue damage			Figure 2A. IL-2			Figure 2B. LIF			Figure 2C. MCP-1			Figure 2D. TNF			Figure 3A. G-CSF			Figure 3B. MCP-1			Figure 3C. IL-5			Figure 3D. Eotaxin
Interaction			Interaction			Interaction			Interaction			Interaction			Interaction			Interaction			Interaction			Interaction
Colitis x Genotype	F(1,37)=1.16, p=0.29		Colitis x Genotype	F(1,34)=5.24, p=0.03		Colitis x Genotype	F(1,31)=7.01, p=0.01		Colitis x Genotype	F(1,35)=4.89, p=0.03		Colitis x Genotype	F(1,35)=9.18, p=0.005		Colitis x Genotype	F(1,35)=6.33, p=0.02		Colitis x Genotype	F(1,35)=7.46, p=0.01		Colitis x Genotype	F(1,35)=5.17, p=0.03		Colitis x Genotype	F(1,36)=0.06, p=0.81
Main effects			Main effects			Main effects			Main effects			Main effects			Main effects			Main effects			Main effects			Main effects
Colitis	F(1,37)=122.48, p<0.0001		Colitis	F(1,34)=6.21, p=0.02		Colitis	F(1,31)=15.21, p=0.0005		Colitis	F(1,35)=36.78, p<0.0001		Colitis	F(1,35)=28.30, p<0.0001		Colitis	F(1,35)=6.11, p=0.02		Colitis	F(1,35)=1.05, p=0.31		Colitis	F(1,35)=0.43, p<0.51		Colitis	F(1,36)=36.46, p<0.0001
Genotype	F(1,37)=0.62, p=0.44		Genotype	F(1,34)=3.02, p=0.09		Genotype	F(1,31)=3.87, p=0.06		Genotype	F(1,35)=3.83, p=0.06		Genotype	F(1,35)=8.23, p=0.007		Genotype	F(1,35)=2.81, p=0.10		Genotype	F(1,31)=8.41, p=0.006		Genotype	F(1,35)=0.64, p=0.43		Genotype	F(1,36)=0.01, p=0.92
Multiple comparisons			Multiple comparisons			Multiple comparisons			Multiple comparisons			Multiple comparisons			Multiple comparisons			Multiple comparisons			Multiple comparisons			Multiple comparisons
C vs. A			C vs. A			C vs. A			C vs. A			C vs. A			C vs. A			C vs. A			C vs. A			C vs. A
Saline	p=0.84		Saline	p=0.69		Saline	p=0.65		Saline	p=0.86		Saline	p=0.91		Saline	p=0.55		Saline	p=0.91		Saline	p=0.30		Saline	p=0.80
Colitis	p=0.20		Colitis	p=0.009		Colitis	p=0.0002		Colitis	p=0.006		Colitis	p=0.0002		Colitis	p=0.006		Colitis	p=0.0004		Colitis	p=0.04		Colitis	p=0.92
Saline vs. Colitis			Saline vs. Colitis			Saline vs. Colitis			Saline vs. Colitis			Saline vs. Colitis			Saline vs. Colitis			Saline vs. Colitis			Saline vs. Colitis			Saline vs. Colitis
C	p<0.0001		C	p=0.006		C	p=0.0004		C	p<0.0001		C	p<0.0001		C	p=0.004		C	p=0.03		C	p=0.33		C	p=0.0005
A	p<0.0001		A	p=0.86		A	p=0.27		A	p=0.002		A	p=0.06		A	p=0.97		A	p=0.15		A	p=0.02		A	p<0.0001
Figure 1B. MPO Activity			Figure 2E. RANTES			Figure 2F. IL-1⍺			Figure 2G. LIX			Figure 2H. M-CSF			Figure 3E. IL-13			Figure 3F. KC			Figure 3G. IL-12p70			Figure 3H. VEGF
Interaction			Interaction			Interaction			Interaction			Interaction			Interaction			Interaction			Interaction			Interaction
Colitis x Genotype	F(1,37)=0.26, p=0.61		Colitis x Genotype	F(1,37)=5.56, p=0.02		Colitis x Genotype	F(1,37)=8.32, p=0.007		Colitis x Genotype	F(1,35)=5.75, p=0.02		Colitis x Genotype	F(1,32)=4.08, p=0.05		Colitis x Genotype	F(1,33)=0.09, p=0.76		Colitis x Genotype	F(1,37)=0.11, p=0.74		Colitis x Genotype	F(1,36)=2.76, p=0.11		Colitis x Genotype	F(1,37)=0.24, p=0.63
Main effects			Main effects			Main effects			Main effects			Main effects			Main effects			Main effects			Main effects			Main effects
Colitis	F(1,37)=17.94, p=0.0001		Colitis	F(1,37)=0.20, p=0.66		Colitis	F(1,37)=17.23, p=0.0002		Colitis	F(1,35)=23.32, p<0.0001		Colitis	F(1,32)=5.85, p=0.02		Colitis	F(1,33)=4.15, p=0.05		Colitis	F(1,37)=12.47, p=0.001		Colitis	F(1,36)=4.77, p=0.04		Colitis	F(1,37)=26.43, p<0.0001
Genotype	F(1,37)=0.72, p=0.41		Genotype	F(1,37)=2.21, p=0.15		Genotype	F(1,37)=6.87, p=0.01		Genotype	F(1,35)=2.45, p=0.13		Genotype	F(1,32)=4.44, p=0.04		Genotype	F(1,33)=0.41, p=0.53		Genotype	F(1,37)=0.002, p=0.96		Genotype	F(1,36)=0.35, p=0.46		Genotype	F(1,37)=0.17, p=0.68
Multiple comparisons			Multiple comparisons			Multiple comparisons			Multiple comparisons			Multiple comparisons			Multiple comparisons			Multiple comparisons			Multiple comparisons			Multiple comparisons
C vs. A			C vs. A			C vs. A			C vs. A			C vs. A			C vs. A			C vs. A			C vs. A			C vs. A
Saline	p=0.81		Saline	p=0.54		Saline	p=0.0004		Saline	p=0.008		Saline	p=0.005		Saline	p=0.82		Saline	p=0.79		Saline	p=0.50		Saline	p=0.96
Colitis	p=0.34		Colitis	p=0.01		Colitis	p=0.085		Colitis	p=0.56		Colitis	p=0.95		Colitis	p=0.50		Colitis	p=0.84		Colitis	p=0.11		Colitis	p=0.53
Saline vs. Colitis			Saline vs. Colitis			Saline vs. Colitis			Saline vs. Colitis			Saline vs. Colitis			Saline vs. Colitis			Saline vs. Colitis			Saline vs. Colitis			Saline vs. Colitis
C	p=0.03		C	p=0.10		C	p=0.0001		C	p<0.0001		C	p=0.01		C	p=0.15		C	p=0.06		C	p=0.03		C	p=0.002
A	p=0.002		A	p=0.10		A	p=0.27		A	p=0.04		A	p=0.73		A	p=0.16		A	p=0.002		A	p=0.63		A	p=0.0002
			Figure 2I. G-CSF			Figure 2J. GM-CSF			Figure 2K. IL-6			Figure 2L. IL-15			Figure 3I. IL-1⍺			Figure 3J. IL-9			Figure 3K. MIP-1β			Figure 3L. MIP-2
			Interaction			Interaction			Interaction			Interaction			Interaction			Interaction			Interaction			Interaction
			Colitis x Genotype	F(1,36)=1.13, p=0.29		Colitis x Genotype	F(1,37)=0.02, p=0.88		Colitis x Genotype	F(1,31)=0.12, p=0.73		Colitis x Genotype	F(1,33)=0.02, p=0.90		Colitis x Genotype	F(1,37)=1.30, p=0.26		Colitis x Genotype	F(1,37)=1.03, p=0.32		Colitis x Genotype	F(1,35)=0.16, p=0.69		Colitis x Genotype	F(1,37)=0.11, p=0.74
			Main effects			Main effects			Main effects			Main effects			Main effects			Main effects			Main effects			Main effects
			Colitis	F(1,36)=20.48, p<0.0001		Colitis	F(1,37)=6.50, p=0.02		Colitis	F(1,31)=13.72, p=0.0008		Colitis	F(1,33)=4.96, p=0.03		Colitis	F(1,37)=1.98, p=0.17		Colitis	F(1,37)=0.07, p=0.80		Colitis	F(1,35)=0.34, p=0.56		Colitis	F(1,37)=0.62, p=0.44
			Genotype	F(1,36)=1.24, p=0.27		Genotype	F(1,37)=0.08, p=0.78		Genotype	F(1,31)=0.15, p=0.70		Genotype	F(1,33)=0.28, p=0.60		Genotype	F(1,37)=5.30, p=0.03		Genotype	F(1,37)=4.36, p=0.04		Genotype	F(1,35)=9.73, p=0.004		Genotype	F(1,37)=8.13, p=0.007
			Multiple comparisons			Multiple comparisons			Multiple comparisons			Multiple comparisons			Multiple comparisons			Multiple comparisons			Multiple comparisons			Multiple comparisons
			C vs. A			C vs. A			C vs. A			C vs. A			C vs. A			C vs. A			C vs. A			C vs. A
			Saline	p=0.97		Saline	p=0.93		Saline	p=0.98		Saline	p=0.67		Saline	p=0.41		Saline	p=0.45		Saline	p=0.02		Saline	p=0.08
			Colitis	p=0.13		Colitis	p=0.77		Colitis	p=0.60		Colitis	p=0.77		Colitis	p=0.02		Colitis	p=0.04		Colitis	p=0.07		Colitis	p=0.03
			Saline vs. Colitis			Saline vs. Colitis			Saline vs. Colitis			Saline vs. Colitis			Saline vs. Colitis			Saline vs. Colitis			Saline vs. Colitis			Saline vs. Colitis
			C	p=0.002		C	p=0.11		C	p=0.02		C	p=0.17		C	p=0.13		C	p=0.65		C	p=0.91		C	p=0.79
			A	p=0.005		A	p=0.04		A	p=0.006		A	p=0.07		A	p=0.81		A	p=0.27		A	p=0.40		A	p=0.33
			Figure 2M. IP-10			Figure 2N. KC			Figure 2O. MIP-1⍺			Figure 2P. MIP-1β			Figure 3M. GM-CSF			Figure 3N. INFγ			Figure 3O. IL-1β			Figure 3P. IL-2
			Interaction			Interaction			Interaction			Interaction						Interaction			Interaction			Interaction
			Colitis x Genotype	F(1,36)=0.39, p=0.54		Colitis x Genotype	F(1,35)=0.12, p=0.73		Colitis x Genotype	F(1,36)=0.09, p=0.77		Colitis x Genotype	F(1,36)=1.47, p=0.23					Colitis x Genotype	F(1,37)=0.02, p=0.90		Colitis x Genotype	F(1,32)=0.32, p=0.57		Colitis x Genotype	F(1,37)=0.44, p=0.51
			Main effects			Main effects			Main effects			Main effects						Main effects			Main effects			Main effects
			Colitis	F(1,36)=17.00, p=0.0002		Colitis	F(1,35)=27.04, p<0.0001		Colitis	F(1,36)=17.21, p=0.0002		Colitis	F(1,36)=15.19, p=0.0004					Colitis	F(1,37)=2.69, p=0.11		Colitis	F(1,32)=0.32, p=0.57		Colitis	F(1,37)=0.09, p=0.77
			Genotype	F(1,36)=2.57, p=0.12		Genotype	F(1,35)=0.23, p=0.63		Genotype	F(1,36)=0.08, p=0.78		Genotype	F(1,36)=3.32, p=0.08					Genotype	F(1,37)=0.04, p=0.85		Genotype	F(1,32)=0.32, p=0.57		Genotype	F(1,37)=2.11, p=0.16
			Multiple comparisons			Multiple comparisons			Multiple comparisons			Multiple comparisons						Multiple comparisons			Multiple comparisons			Multiple comparisons
			C vs. A			C vs. A			C vs. A			C vs. A						C vs. A			C vs. A			C vs. A
			Saline	p=0.50		Saline	p=0.92		Saline	p=0.68		Saline	p=0.67					Saline	p=0.96		Saline	p=0.41		Saline	p=0.58
			Colitis	p=0.12		Colitis	p=0.58		Colitis	p=0.99		Colitis	p=0.04					Colitis	p=0.82		Colitis	p>0.99		Colitis	p=0.14
			Saline vs. Colitis			Saline vs. Colitis			Saline vs. Colitis			Saline vs. Colitis						Saline vs. Colitis			Saline vs. Colitis			Saline vs. Colitis
			C	p=0.006		C	p=0.002		C	p=0.01		C	p=0.004					C	p=0.37		C	p=0.48		C	p=0.56
			A	p=0.004		A	p<0.0001		A	p=0.002		A	p=0.02					A	p=0.13		A	p>0.99		A	p=0.75
			Figure 2Q. MIG			Figure 2R. MIP-2			Figure 2S. Eotaxin			Figure 2T. INFγ			Figure 3Q. IL-3			Figure 3R. IL-4			Figure 3S. IL-6			Figure 3T. IL-7
			Interaction			Interaction			Interaction			Interaction			Interaction			Interaction			Interaction			Interaction
			Colitis x Genotype	F(1,36)=0.37, p=0.55		Colitis x Genotype	F(1,33)=1.09, p=0.30		Colitis x Genotype	F(1,32)=0.14, p=0.71		Colitis x Genotype	F(1,36)=0.74, p=0.39		Colitis x Genotype	F(1,37)=0.04, p=0.84		Colitis x Genotype	F(1,37)=0.34, p=0.56		Colitis x Genotype	F(1,37)=0.03, p=0.87		Colitis x Genotype	F(1,37)=0.61, p=0.44
			Main effects			Main effects			Main effects			Main effects			Main effects			Main effects			Main effects			Main effects
			Colitis	F(1,36)=10.25, p=0.003		Colitis	F(1,33)=4.82, p=0.04		Colitis	F(1,32)=1.10, p=0.30		Colitis	F(1,36)=1.81, p=0.19		Colitis	F(1,37)=0.51, p=0.48		Colitis	F(1,37)=1.51, p=0.23		Colitis	F(1,37)=3.49, p=0.07		Colitis	F(1,37)=0.97, p=0.33
			Genotype	F(1,36)=0.50, p=0.48		Genotype	F(1,33)=1.12, p=0.30		Genotype	F(1,32)=0.21, p=0.65		Genotype	F(1,36)=0.17, p=0.69		Genotype	F(1,37)=1.76, p=0.19		Genotype	F(1,37)=1.58, p=0.22		Genotype	F(1,37)=1.80, p=0.19		Genotype	F(1,37)=0.03, p=0.87
			Multiple comparisons			Multiple comparisons			Multiple comparisons			Multiple comparisons			Multiple comparisons			Multiple comparisons			Multiple comparisons			Multiple comparisons
			C vs. A			C vs. A			C vs. A			C vs. A			C vs. A			C vs. A			C vs. A			C vs. A
			Saline	p=0.36		Saline	p=0.14		Saline	p=0.63		Saline	p=0.75		Saline	p=0.43		Saline	p=0.20		Saline	p=0.41		Saline	p=0.67
			Colitis	p=0.94		Colitis	p=0.99		Colitis	p=0.33		Colitis	p=0.38		Colitis	p=0.29		Colitis	p=0.64		Colitis	p=0.29		Colitis	p=0.51
			Saline vs. Colitis			Saline vs. Colitis			Saline vs. Colitis			Saline vs. Colitis			Saline vs. Colitis			Saline vs. Colitis			Saline vs. Colitis			Saline vs. Colitis
			C	p=0.12		C	p=0.06		C	p=0.96		C	p=0.77		C	p=0.58		C	p=0.70		C	p=0.31		C	p=0.29
			A	p=0.002		A	p=0.30		A	p=0.41		A	p=0.06		A	p=0.66		A	p=0.12		A	p=0.08		A	p=0.86
			Figure 2U. IL-1β			Figure 2V. IL-3			Figure 2W. IL-4			Figure 2X. IL-5			Figure 3U. IL-10			Figure 3V. IL-12p40			Figure 3W. IL-15			Figure 3X. IL-17A
			Interaction			Interaction			Interaction			Interaction			Interaction			Interaction			Interaction			Interaction
			Colitis x Genotype	F(1,36)=0.69, p=0.41		Colitis x Genotype	F(1,36)=4.09, p=0.05		Colitis x Genotype	F(1,35)=0.02, p=p=0.90		Colitis x Genotype	F(1,36)=1.74, p=0.20		Colitis x Genotype	F(1,37)=0.41, p=0.53		Colitis x Genotype	F(1,36)=0.33, p=0.57		Colitis x Genotype	F(1,37)=0.11, p=0.75		Colitis x Genotype	F(1,37)=1.21, p=0.28
			Main effects			Main effects			Main effects			Main effects			Main effects			Main effects			Main effects			Main effects
			Colitis	F(1,36)=1.91, p=0.18		Colitis	F(1,36)=0.0006, p=0.98		Colitis	F(1,35)=2.41, p=0.13		Colitis	F(1,36)=2.91, p=0.10		Colitis	F(1,37)=3.17, p=0.08		Colitis	F(1,36)=0.41, p=0.53		Colitis	F(1,37)=0.05, p=0.82		Colitis	F(1,37)=1.47, p=0.23
			Genotype	F(1,36)=0.02, p=0.89		Genotype	F(1,36)=0.42, p=0.52		Genotype	F(1,35)=0.31, p=0.31		Genotype	F(1,36)=1.45, p=0.24		Genotype	F(1,37)=0.19, p=0.67		Genotype	F(1,36)=0.05, p=0.82		Genotype	F(1,37)=0.10, p=0.75		Genotype	F(1,37)=0.19, p=0.67
			Multiple comparisons			Multiple comparisons			Multiple comparisons			Multiple comparisons			Multiple comparisons			Multiple comparisons			Multiple comparisons			Multiple comparisons
			C vs. A			C vs. A			C vs. A			C vs. A			C vs. A			C vs. A			C vs. A			C vs. A
			Saline	p=0.63		Saline	p=0.34		Saline	p=0.76		Saline	p=0.07		Saline	p=0.45		Saline	p=0.81		Saline	p=0.65		Saline	p=0.28
			Colitis	p=0.50		Colitis	p=0.07		Colitis	p=0.64		Colitis	p=0.94		Colitis	p=0.89		Colitis	p=0.57		Colitis	p>0.99		Colitis	p=0.64
			Saline vs. Colitis			Saline vs. Colitis			Saline vs. Colitis			Saline vs. Colitis			Saline vs. Colitis			Saline vs. Colitis			Saline vs. Colitis			Saline vs. Colitis
			C	p=0.74		C	p=0.22		C	p=0.39		C	p=0.82		C	p=0.49		C	p=0.97		C	p=0.74		C	p=0.95
			A	p=0.06		A	p=0.09		A	p=0.16		A	p=0.009		A	p=0.04		A	p=0.29		A	p=0.93		A	p=0.05
			Figure 2Y. IL-7			Figure 2Z. IL-9			Figure 2AA. IL-10			Figure 2AB. IL-12p40			Figure 3Y. IP-10			Figure 3Z. LIF			Figure 3AA. M-CSF			Figure 3AB. MIG
			Interaction			Interaction			Interaction			Interaction			Interaction			Interaction			Interaction			Interaction
			Colitis x Genotype	F(1,33)=0.009, p=0.92		Colitis x Genotype	F(1,37)=0.92, p=0.34		Colitis x Genotype	F(1,30)=0.05, p=0.83		Colitis x Genotype	F(1,35)=1.66, p=0.21		Colitis x Genotype	F(1,36)=0.49, p=0.49		Colitis x Genotype	F(1,37)=0.04, p=0.85		Colitis x Genotype	F(1,36)=0.04, p=0.83		Colitis x Genotype	F(1,37)=1.99, p=0.17
			Main effects			Main effects			Main effects			Main effects			Main effects			Main effects			Main effects			Main effects
			Colitis	F(1,33)=1.78, p=0.19		Colitis	F(1,37)=0.0001, p>0.99		Colitis	F(1,30)=0.62, p=0.44		Colitis	F(1,35)=0.25, p=0.62		Colitis	F(1,36)=2.25, p=0.14		Colitis	F(1,37)=2.58, p=0.12		Colitis	F(1,36)=0.34, p=0.56		Colitis	F(1,37)=2.62, p=0.11
			Genotype	F(1,33)=0.008, p=0.093		Genotype	F(1,37)=3.87, p=0.06		Genotype	F(1,30)=0.46, p=0.50		Genotype	F(1,35)=1.45, p=0.24		Genotype	F(1,36)=2.82, p=0.10		Genotype	F(1,37)=1.44, p=0.24		Genotype	F(1,36)=0.61, p=0.44		Genotype	F(1,37)=3.94, p=0.05
			Multiple comparisons			Multiple comparisons			Multiple comparisons			Multiple comparisons			Multiple comparisons			Multiple comparisons			Multiple comparisons			Multiple comparisons
			C vs. A			C vs. A			C vs. A			C vs. A			C vs. A			C vs. A			C vs. A			C vs. A
			Saline	p>0.99		Saline	p=0.48		Saline	p=0.52		Saline	p=0.09		Saline	p=0.10		Saline	p=0.48		Saline	p=0.48		Saline	p=0.02
			Colitis	p=0.89		Colitis	p=0.05		Colitis	p=0.75		Colitis	p=0.50		Colitis	p=0.49		Colitis	p=0.33		Colitis	p=0.69		Colitis	p=0.69
			Saline vs. Colitis			Saline vs. Colitis			Saline vs. Colitis			Saline vs. Colitis			Saline vs. Colitis			Saline vs. Colitis			Saline vs. Colitis			Saline vs. Colitis
			C	p=0.46		C	p=0.57		C	p=0.74		C	p=0.28		C	p=0.19		C	p=0.40		C	p=0.82		C	p=0.90
			A	p=0.21		A	p=0.40		A	p=0.34		A	p=0.95		A	p=0.49		A	p=0.12		A	p=0.49		A	p=0.01
			Figure 2AC. IL-12p70			Figure 2AD. IL-13			Figure 2AE. IL-17A			Figure 2AF. VEGF			Figure 3AC. MIP-1⍺			Figure 3AD. RANTES			Figure 3AE. TNF
			Interaction			Interaction			Interaction			Interaction			Interaction			Interaction			Interaction
			Colitis x Genotype	F(1,35)=2.59, p=0.12		Colitis x Genotype	F(1,34)=0.04, p=0.85		Colitis x Genotype	F(1,37)=0.36, p=0.55		Colitis x Genotype	F(1,36)=1.92, p=0.17		Colitis x Genotype	F(1,37)=0.88, p=0.35		Colitis x Genotype	F(1,37)=1.51, p=0.23		Colitis x Genotype	F(1,37)=1.53, p=0.22
			Main effects			Main effects			Main effects			Main effects			Main effects			Main effects			Main effects
			Colitis	F(1,35)=2.26, p=0.14		Colitis	F(1,34)=3.55, p=0.07		Colitis	F(1,37)=4.06, p=0.05		Colitis	F(1,36)=0.08, p=0.79		Colitis	F(1,37)=0.38, p=0.54		Colitis	F(1,37)=2.03, p=0.16		Colitis	F(1,37)=1.53, p=0.22
			Genotype	F(1,35)=0.002, p=0.97		Genotype	F(1,34)=0.01, p=0.91		Genotype	F(1,37)=0.11, p=0.74		Genotype	F(1,36)=0.85, p=0.36		Genotype	F(1,37)=3.61, p=0.07		Genotype	F(1,37)=0.002, p=0.96		Genotype	F(1,37)=1.01, p=0.32
			Multiple comparisons			Multiple comparisons			Multiple comparisons			Multiple comparisons			Multiple comparisons			Multiple comparisons			Multiple comparisons
			C vs. A			C vs. A			C vs. A			C vs. A			C vs. A			C vs. A			C vs. A
			Saline	p=0.28		Saline	p=0.83		Saline	p=0.85		Saline	p=0.74		Saline	p=0.50		Saline	p=0.37		Saline	p=0.12
			Colitis	p=0.25		Colitis	p=0.96		Colitis	p=0.52		Colitis	p=0.11		Colitis	p=0.05		Colitis	p=0.41		Colitis	p=0.87
			Saline vs. Colitis			Saline vs. Colitis			Saline vs. Colitis			Saline vs. Colitis			Saline vs. Colitis			Saline vs. Colitis			Saline vs. Colitis
			C	p=0.95		C	p=0.30		C	p=0.40		C	p=0.50		C	p=0.35		C	p=0.12		C	p>0.99
			A	p=0.01		A	p=0.09		A	p=0.03		A	p=0.15		A	p=0.78		A	p=0.86		A	p=0.04
